# Supplementary material for: Association between relocation and changes in cardiometabolic risk factors: a longitudinal study in tsunami survivors of the 2011 Great East Japan Earthquake
Source: PubMed Central journal article supplement — BMJ Open. 2016 May 12;6(5):e011291. doi: 10.1136/bmjopen-2016-011291 (PMC4874105; doi:10.1136/bmjopen-2016-011291), 2016-05-12
Supplement: bmjopen-2016-011291supp.pdf [file bmjopen-2016-011291supp.pdf]

Supplementary Figures

Fig S1. Landscape of Rikuzentakata after the devastating tsunami.

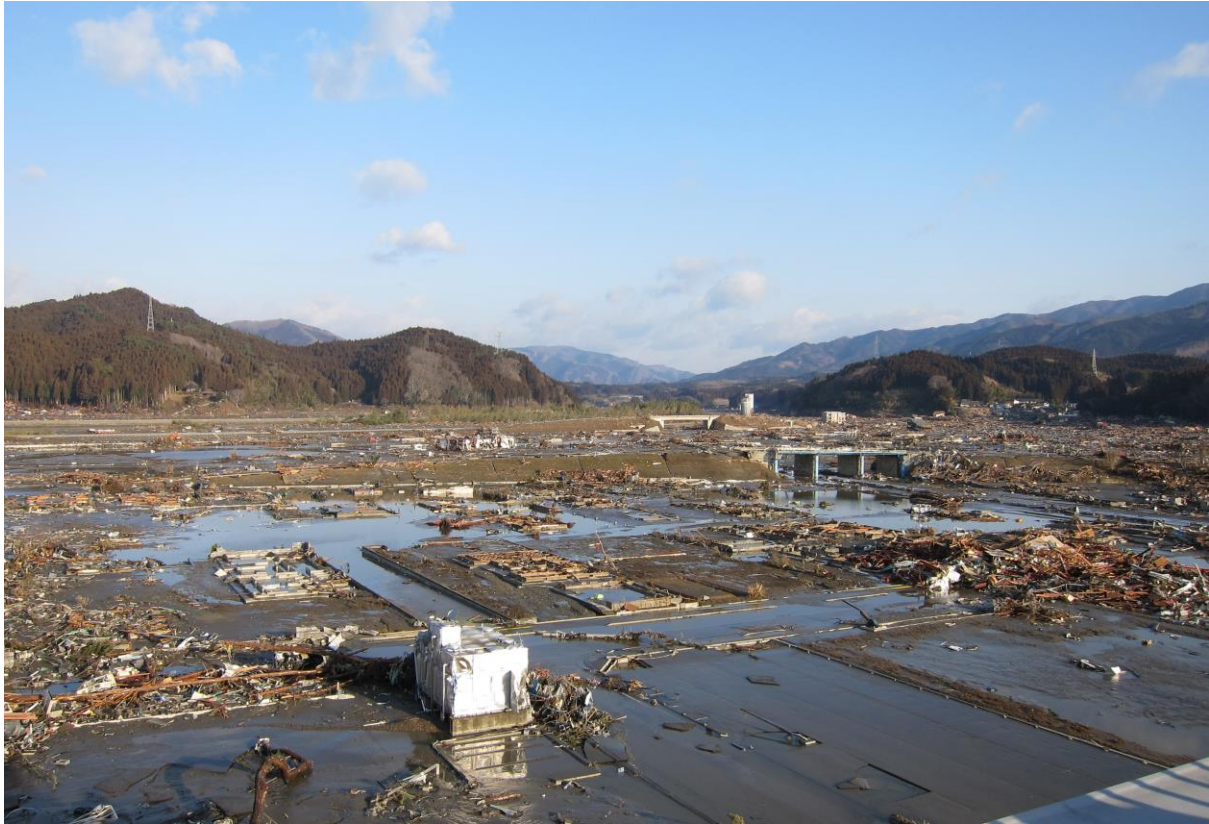

Fig S2. Typical outside image of temporary housing.

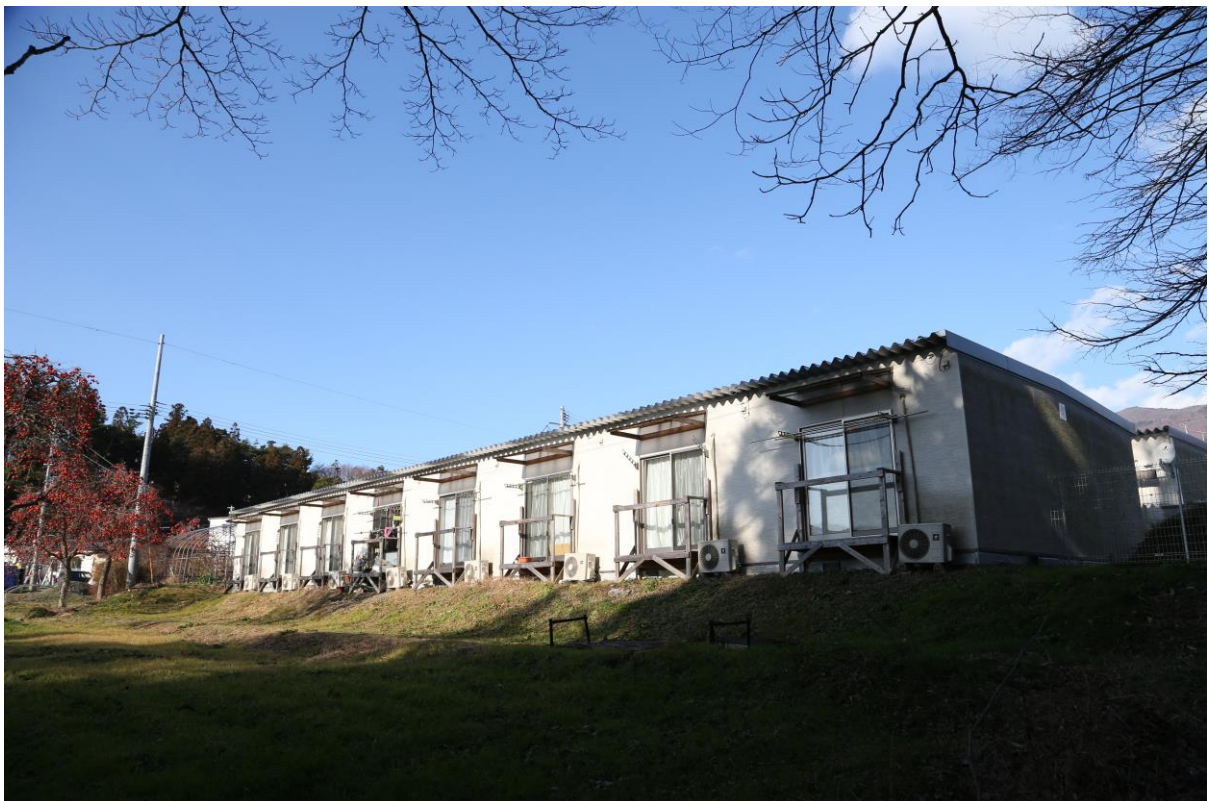

Fig S3. Typical inside image of temporary housing.

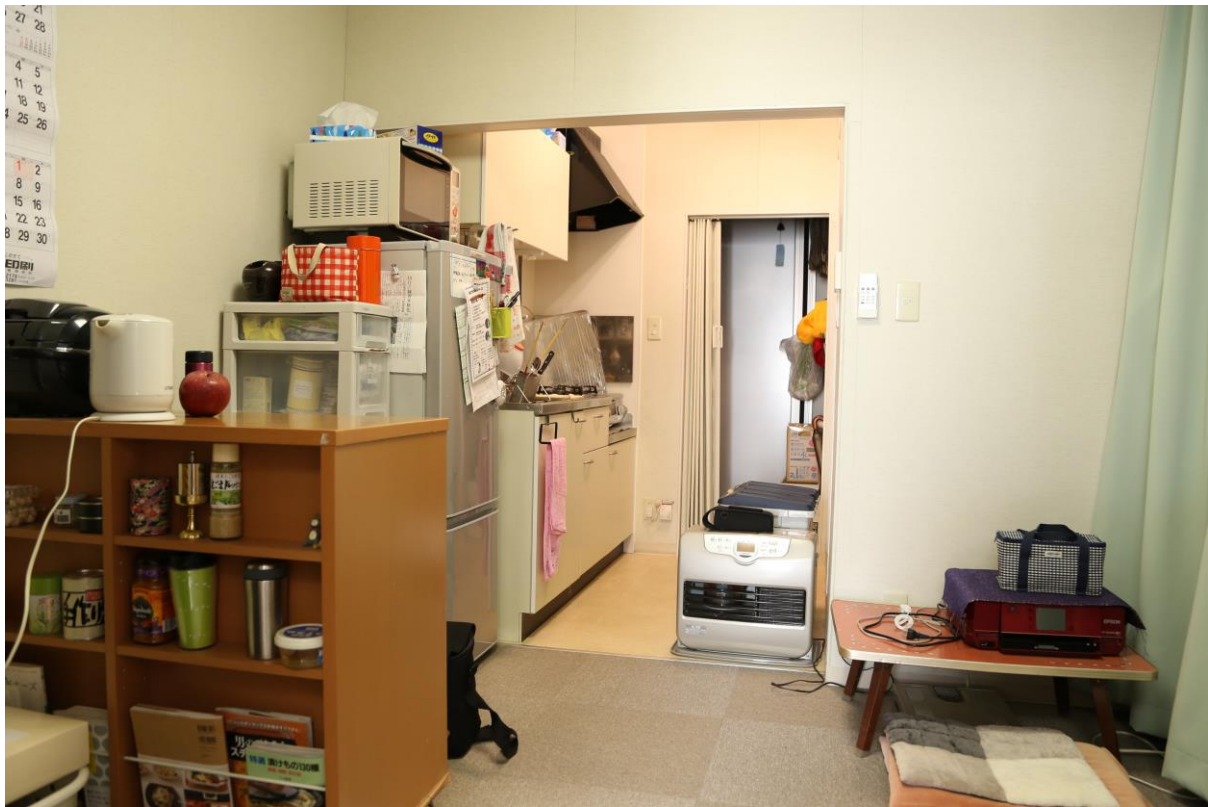

**S1 Table. Comparison of baseline characteristics at the phase 1 survey between the non participants and the participants.**

|                          | Crude                    |                             | <i>p</i> | Adjusted                 |                             | <i>p</i> |
|--------------------------|--------------------------|-----------------------------|----------|--------------------------|-----------------------------|----------|
|                          | Non-paticipants (N=2689) | Study participants (N=6528) |          | Non-paticipants (N=2689) | Study participants (N=6528) |          |
| Demographic              |                          |                             |          |                          |                             |          |
| Sex (Male)               | 43.60%                   | 38.30%                      | < 0.001  |                          |                             |          |
| Age (yr)                 | 57.1 ( 56.5 - 57.7 )     | 62.3 ( 62.0 - 62.6 )        | < 0.001  |                          |                             |          |
| Anthropometric data      |                          |                             |          |                          |                             |          |
| Body weight (kg)         | 59.5 ( 59.1 - 60.0 )     | 58.2 ( 58.0 - 58.5 )        | < 0.001  | 59.7 ( 59.3 - 60.0 )     | 59.9 ( 59.7 - 60.1 )        | 0.286    |
| Waist circumference (cm) | 82.9 ( 82.6 - 83.3 )     | 83.0 ( 82.8 - 83.2 )        | 0.658    | 83.4 ( 83.0 - 83.8 )     | 83.3 ( 83.0 - 83.5 )        | 0.577    |
| Clinical data            |                          |                             |          |                          |                             |          |
| SBP (mmHg)               | 125.5 ( 124.8 - 126.2 )  | 126.4 ( 126.0 - 126.9 )     | 0.132    | 127.3 ( 126.6 - 127.9 )  | 126.2 ( 125.8 - 126.7 )     | 0.012    |
| DBP (mmHg)               | 74.1 ( 73.7 - 74.6 )     | 74.3 ( 74.0 - 74.5 )        | 0.974    | 74.8 ( 74.4 - 75.2 )     | 74.6 ( 74.3 - 74.8 )        | 0.381    |
| TC (mg/dl)               | 202.8 ( 201.3 - 204.2 )  | 205.1 ( 204.3 - 206.0 )     | 0.001    | 202.1 ( 200.8 - 203.5 )  | 203.8 ( 202.9 - 204.6 )     | 0.05     |
| HDLC (mg/dl)             | 63.3 ( 62.7 - 64.0 )     | 63.8 ( 63.4 - 64.2 )        | 0.086    | 62.5 ( 61.8 - 63.1 )     | 63.1 ( 62.7 - 63.5 )        | 0.087    |
| LDLC (mg/dl)             | 115.4 ( 114.2 - 116.6 )  | 118.2 ( 117.4 - 118.9 )     | < 0.001  | 115.4 ( 114.2 - 116.5 )  | 117.1 ( 116.4 - 117.9 )     | 0.013    |
| non HDLC (mg/dl)         | 139.4 ( 137.9 - 140.9 )  | 141.3 ( 140.4 - 142.2 )     | 0.013    | 139.7 ( 138.3 - 141.1 )  | 140.6 ( 139.7 - 141.6 )     | 0.26     |
| LH ratio                 | 1.98 ( 1.95 - 2.01 )     | 2.00 ( 1.98 - 2.02 )        | 0.284    | 2.00 ( 1.97 - 2.03 )     | 2.01 ( 1.99 - 2.03 )        | 0.78     |
| TG (mg/dl)               | 140.5 ( 136.7 - 144.3 )  | 138.5 ( 136.4 - 140.6 )     | 0.174    | 141.9 ( 138.5 - 145.4 )  | 141.8 ( 139.6 - 144.1 )     | 0.954    |
| HbA1c (%)                | 5.66 ( 5.63 - 5.69 )     | 5.68 ( 5.66 - 5.69 )        | 0.173    | 5.70 ( 5.68 - 5.72 )     | 5.67 ( 5.66 - 5.69 )        | 0.074    |
| Life Style               |                          |                             |          |                          |                             |          |
| Current smokers          | 23.8%                    | 13.9%                       | < 0.001  | 17.0%                    | 13.0%                       | < 0.001  |
| Drinkers                 | 36.7%                    | 31.9%                       | < 0.001  | 34.0%                    | 34.0%                       | 0.977    |
| Low physical activity    | 64.3%                    | 65.6%                       | 0.237    | 65.0%                    | 64.0%                       | 0.84     |
| Mental health            |                          |                             |          |                          |                             |          |
| Psychological distress   | 43.4%                    | 41.9%                       | 0.192    | 42.0%                    | 41.0%                       | 0.374    |
| Sleep difficulty         | 32.2%                    | 32.5%                       | 0.732    | 31.0%                    | 31.0%                       | 0.84     |
| Socioeconomic status     |                          |                             |          |                          |                             |          |
| Unemployment             | 20.1%                    | 18.7%                       | 0.119    | 18.0%                    | 18.0%                       | 0.9      |
| Economic deprivation     | 53.6%                    | 50.5%                       | 0.006    | 52.0%                    | 52.0%                       | 0.862    |

Abbreviations: CI, confidence interval; SBP, systolic blood pressure; DBP, diastolic blood pressure; TC, total cholesterol; HDLC, high-density lipoprotein cholesterol; LDLC, low-density lipoprotein cholesterol; nonHDLC, non-high-density lipoprotein cholesterol; LH ratio, LDL/HDL cholesterol ratio; TG, triglyceride; HbA1c, glycosylated haemoglobin

In the crude analysis, categorical variables are shown as proportion (%) and continuous variables are shown as mean and 95% CI.

In sex- and age- adjusted analysis, categorical variables are shown as adjusted proportion (%) and continuous variables are shown as adjusted mean and 95% CI.
